# Supplementary material for: The implementation of Polish guidelines regarding ineffective maintenance of organ functions (futile therapy) in pediatric intensive care units: a four-year review
Source: Research Square preprint supplement (doi:10.21203/rs.3.rs-7190304/v1), 2025-12-02
Supplement: Supplementary file 1 [file c8a900003f3ce8e9195c8e5b.docx]

Table 1. Characteristics of the study group

|  |  |  | **Sex** | |  |
| --- | --- | --- | --- | --- | --- |
| **Variables** | **N** | **Total**  N = 2021 | **Males**  N = 1191 | **Females**  N = 831 | **p-value**2 |
| **Hospital location (city)** | 202 |  |  |  | 0.8 |
| Krakow |  | 103 (51.0%) | 59 (49.6%) | 44 (53.0%) |  |
| Lublin |  | 16 (7.9%) | 11 (9.2%) | 5 (6.0%) |  |
| Katowice |  | 15 (7.4%) | 8 (6.7%) | 7 (8.4%) |  |
| Poznan |  | 10 (5.0%) | 6 (5.0%) | 4 (4.8%) |  |
| Wroclaw |  | 15 (7.4%) | 11 (9.2%) | 4 (4.8%) |  |
| Warsaw |  | 43 (21.3%) | 24 (20.2%) | 19 (22.9%) |  |
| **Age (months)** | 201 | 24 (1 - 120) | 24 (1 - 132) | 24 (1 - 120) | 0.4 |
| Missing data |  | 1 | 1 | 0 |  |
| **Primary disease** | 199 |  |  |  | 0.9 |
| Neurological disease |  | 108 (54.3%) | 66 (56.9%) | 42 (50.6%) |  |
| Oncological disease |  | 33 (16.6%) | 17 (14.7%) | 16 (19.3%) |  |
| Prematurity |  | 25 (12.6%) | 14 (12.1%) | 11 (13.3%) |  |
| Severe heart defect |  | 23 (11.6%) | 13 (11.2%) | 10 (12.0%) |  |
| Trauma/cardiac arrest |  | 10 (5.0%) | 6 (5.2%) | 4 (4.8%) |  |
| Missing data |  | 3 | 3 | 0 |  |
| **Comorbid condition** | 185 |  |  |  | 0.3 |
| Severe neurological damage |  | 69 (37.3%) | 40 (36.0%) | 29 (39.2%) |  |
| Multiorgan failure |  | 79 (42.7%) | 44 (39.6%) | 35 (47.3%) |  |
| Chronic respiratory failure |  | 20 (10.8%) | 14 (12.6%) | 6 (8.1%) |  |
| Heart failure |  | 17 (9.2%) | 13 (11.7%) | 4 (5.4%) |  |
| Missing data |  | 17 | 8 | 9 |  |
| **Duration of the primary disease** | 202 |  |  |  | 0.6 |
| Since birth |  | 157 (77.7%) | 96 (80.7%) | 61 (73.5%) |  |
| One year |  | 15 (7.4%) | 9 (7.6%) | 6 (7.2%) |  |
| 6 months |  | 7 (3.5%) | 3 (2.5%) | 4 (4.8%) |  |
| More than 5 years |  | 10 (5.0%) | 4 (3.4%) | 6 (7.2%) |  |
| Sudden onset |  | 13 (6.4%) | 7 (5.9%) | 6 (7.2%) |  |
| **Did the child previously have a life without disease (normal life)?** | 202 |  |  |  | 0.7 |
| No |  | 156 (77.2%) | 93 (78.2%) | 63 (75.9%) |  |
| Yes |  | 46 (22.8%) | 26 (21.8%) | 20 (24.1%) |  |
| **Actions taken after the FT protocol** | 201 |  |  |  | 0.9 |
| Continued mechanical ventilation |  | 99 (49.3%) | 58 (48.7%) | 41 (50.0%) |  |
| Continued spontaneous breathing |  | 102 (50.7%) | 61 (51.3%) | 41 (50.0%) |  |
| Missing data |  | 1 | 0 | 1 |  |
| **Patient outcome** | 202 |  |  |  | 0.5 |
| Discharged to hospice |  | 82 (40.6%) | 51 (42.9%) | 31 (37.3%) |  |
| Died in hospital |  | 120 (59.4%) | 68 (57.1%) | 52 (62.7%) |  |
| **Days from FT protocol to death** | 60 | 6 (3 - 15) | 7 (2 - 17) | 6 (3 - 11) | 0.6 |
| Missing data |  | 142 | 89 | 53 |  |
| **Who first suspected FT (grouped)** | 202 |  |  |  | >0.9 |
| Anesthesiologist |  | 119 (58.9%) | 71 (59.7%) | 48 (57.8%) |  |
| Pediatrician |  | 26 (12.9%) | 16 (13.4%) | 10 (12.0%) |  |
| Other specialist |  | 16 (7.9%) | 10 (8.4%) | 6 (7.2%) |  |
| Neonatologist |  | 41 (20.3%) | 22 (18.5%) | 19 (22.9%) |  |
| 1Percentages may not sum to 100% due to rounding. | | | | | |
| 2Wilcoxon rank sum test; Fisher's exact test. Monte Carlo simulation was applied for contingency tables larger than 2×2 (B = 10,000). | | | | | |
